# Supplementary material for: A tRNA modification-based regulatory strategy for lincomycin biosynthesis in Streptomyces lincolnensis
Source: Research Square preprint supplement (doi:10.21203/rs.3.rs-8038474/v1), 2025-11-18
Supplement: Supplementary file 1 [file 113c6780de6fdeefc1fde42d.docx]

**Fig. S1.** Growth curves of strains xbl1, OpNbldA, ST1, ST2, and ST3 in YEME medium.

**
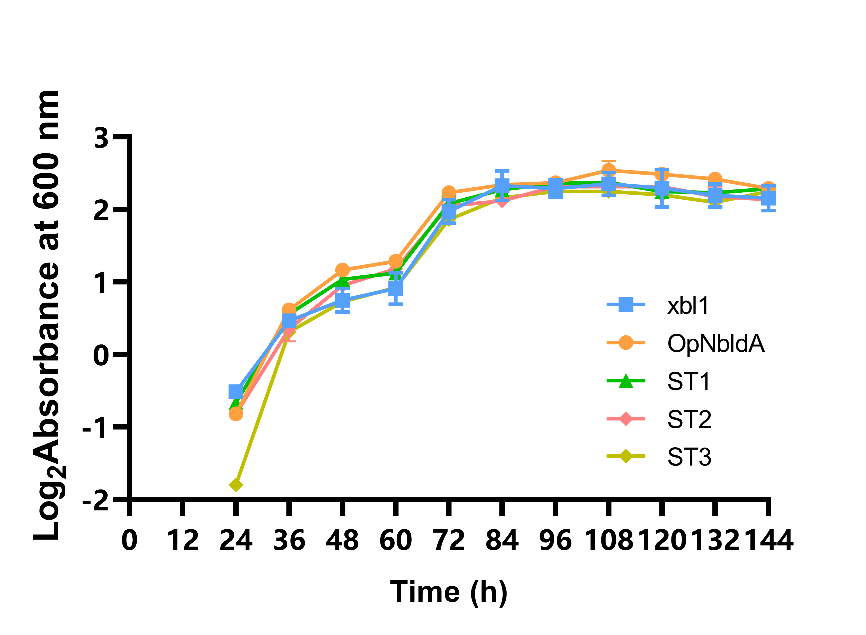
**

**Fig. S2.** Amino acid sequence alignment of MiaA homologues.

**
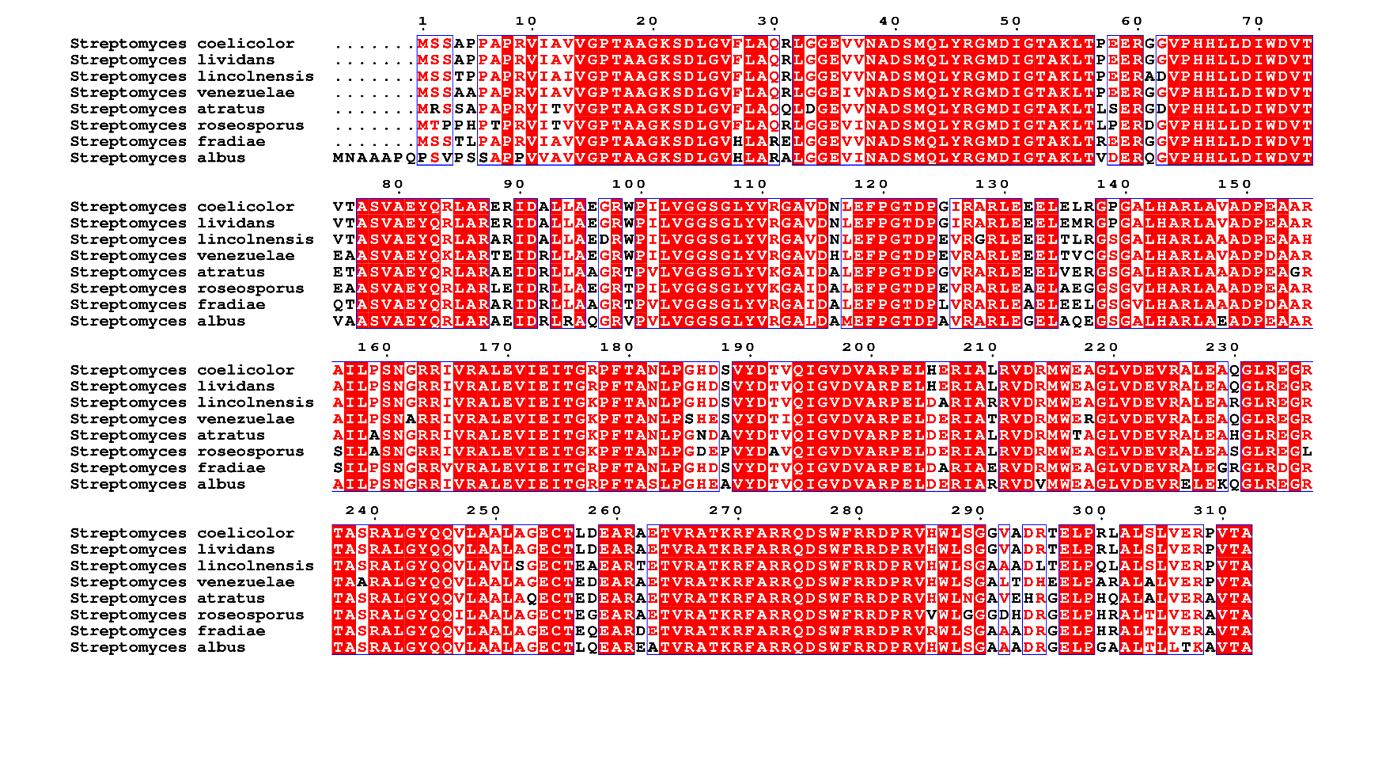
**

**Table S1. Primers used in this study**

| Primers | Sequence (5’ to 3’)a |
| --- | --- |
| Construction of overexpression strain OpNbldA | |
| HbldA-F | CTTCGCTATTACGCCAGCGCTGTCATACCTGGGG |
| HbldA-R | GGCCGATTCATTAATGCAGCTTGCTTTCAGACATGAGTCTC |
| Construction of overexpression strain ST1 | |
| ter-R2 | TGCAGGTCGACTCTAGCTAGGGATCCGACGAACAATAAGGCCTCCCAAATCGGGGGGCCTTTTTTATTGATAACAAAACCTTTGGTCG |
| perm-R | ACAAAACCTTTGGTCGAAAAAAAAAGCCCGCACTGTCAGGTGCGGGCTTTTTTCTGTGTTTCCGCGTGAATTCATTAATGCAGCTGGCA |
| perm-F | TCGGGCCCTGGCCAGCTAGATTACGCCAGCTGGCGAA |
| miaA-EF | CGGTTGGTAGGATCCACATAGTGAGCAGCACACCCC |
| miaA-ER | TCTGTGTTTCCGCGTGAATTTCAGGCTGTAACCGGTC |
| Construction of overexpression strain ST2 | |
| miaB-EF | CGGTTGGTAGGATCCACATAATGACCAGCAGCAGCG |
| miaB-ER | TCTGTGTTTCCGCGTGAATTTCAGGCCGGCGAGCAG |
| Construction of overexpression strain ST3 | |
| miaE-EF | CGGTTGGTAGGATCCACATAATGGGTATCAGGGCTGTG |
| miaE-ER | TCTGTGTTTCCGCGTGAATTTTACCCGAAGGTGGACGG |
| Construction of overexpression strain ST4, ST5, ST6 | |
| Emia-F | GGCCAGCTAGATTACGCCAGTCTAGTATGCATGCGAGT |
| Emia-R | GCACATCCCCCTTTCGCCAGGACGAACAATAAGGCCTCCC |
| Construction of overexpression strain ST7 | |
| EmiaB-ABF | CTAGCTAGAGTCGACCTGCATCTAGTATGCATGCGAGT |
| XylTE reporter assays | |
| xykasO-F | CCTCTTCGCTATTACGCCAGTGTTCACATTCGAACGG |
| xykasO-R | CCTCGTAGCCGGCACTGTTCATAACTCCCCCAGTCCTG |
| xyl-F | ATGAACAGTGCCGGCTACGAGG |
| xyl-R | CGCGTTGGCCGATTCATTAATGCAGTCAGGTCAGCACGGTCATGAATC |
| xyermE-F | CCTCTTCGCTATTACGCCAGTCTAGTATGCATGCGAGT |
| xyermE-R | TCGTAGCCGGCACTGTTCATTGGATCCTACCAACCGGC |
| xythlM4-F | CCTCTTCGCTATTACGCCAGCCTCGCTCTGCCCGGAC |
| xythlM4-R | TCGTAGCCGGCACTGTTCATATGGGTGCGTCTGGGGG |
| xystnY-F | CCTCTTCGCTATTACGCCAGGCATCCGGTCCGCGAAGG |
| xystnY-R | TCGTAGCCGGCACTGTTCATAATTCCGTTGACGATCCC |
| xylmbU-F | CCTCTTCGCTATTACGCCAGAAGGAGGGCGTCTTGCGT |
| xylmbU-R | TCGTAGCCGGCACTGTTCATGCGGCTGCCATCCCTTTC |
| 152F | GCGTAAGGAGAAAATACCGCATCAG |
| 152R | TTCTGTGGATAACCGTATTACCGCC |
| Construction of overexpression strain STY | |
| miaA-F | GTGAGCAGCACACCCCCC |
| miaA-R | TGCAGGTCGACTCTAGCTAGTCAGGCTGTAACCGGTCGTTCG |
| stnY-F | CGGGCCCTGGCCAGCTAGGCATCCGGTCCGCGAAGG |
| stnY-R | GGGGTGTGCTGCTCACAATTCCGTTGACGATCCCCCGAGTG |
| Construction of overexpression strain STK | |
| kasO-F | TCGGGCCCTGGCCAGCTAGCTGTTCACATTCGAACGGTCTC |
| kasO-R | GGGGGGTGTGCTGCTCACCATATGAACTCCCCCAGTC |
| Construction of overexpression strain STM | |
| thlM4-F | TCGGGCCCTGGCCAGCTAGCCCTCGCTCTGCCCGGAC |
| thlM4-R | GGGGGGTGTGCTGCTCACCATATGGGTGCGTCTGGGGG |
| Construction of overexpression strain STU | |
| plmbUmiaA-F | TCGGGCCCTGGCCAGCTAGCAAGGAGGGCGTCTTGCGT |
| plmbUmiaA-R | GGGGGGTGTGCTGCTCACCATAGCGGCTGCCATCCCTTTC |
| Construction of plasmid pBTflag-lmbU | |
| BTFU-F | ACGACGGCCAGTGCCAAGCTAAGGAGGGCGTCTTGCGT |
| BTFU-R | TCTAGAGGATCCCCAACATATTAGGCGCCCCCGACGG |
| Construction of plasmid pBTflag-adpA | |
| adpAF-R | TCGCCGTCGTGGTCCTTGTAGTCACTACCGCCACCGCCAGAGCCACCTCCGCCTGAACCGCCTCCACCCATCCCGCTGCGCTGCCC |
| adpAF-F | ACGACGGCCAGTGCCAAGCTAGCGCGGTGCGGCACGGCTACTGGC |
| flag-R2 | TCTAGAGGATCCCCAACATATTACTTGTCGTCATCGTCCTTGTAGTCGATGTCGTGGTCCTTGTAGTCGCCGTCGTGGTCCTTGT |
| qRT-PCR | |
| hrdB-RTF | GGGCCTTCGAAGCTGACC |
| hrdB-RTR | TGGCCGGACTCTTCGCT |
| qadpAflag-R | GTCGTCATCGTCCTTGTAGTCGA |
| qadpAflag-F | GAGTCCTGTCGGGTCGT |
| qflaglmbU-F | TCGACTACAAGGACGATGACGAC |
| qflaglmbU-R | CCGACGCGAGTGACAAGTAC |
